# Supplementary material
Source: publisher figshare collection journal article supplement (https://acs.figshare.com/ndownloader/files/4495792)
Supplement: Supplementary file 1 [file 4495792]

## Supporting Information

### A Non-biofouling Polymer Brush with Latent Aldehyde Functionality as a Template for Protein Micropatterning

*Yuquan Zou<sup>1</sup>, Po-Ying J. Yeh<sup>3</sup>, Nicholas A. A. Rossi<sup>1</sup>, Donald E. Brooks<sup>1, 2,\*</sup> and  
Jayachandran N. Kizhakkedathu<sup>1\*</sup>*

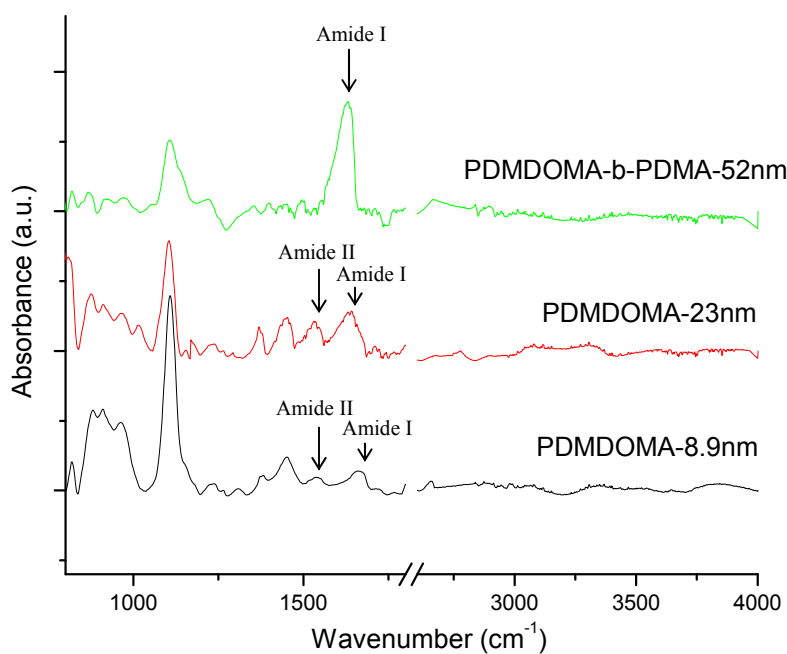

**Figure 1S** ATR-FTIR spectra of PDMDOMA brushes. A PDMDOMA brush with 8.9 nm thickness was grafted from silicon wafer via 1<sup>st</sup> SI-ATRP. With a subsequent feed of DMDOMA monomer, thickness of the PDMDOMA brush was increased to 23 nm (2<sup>nd</sup> SI-ATRP). Block copolymerization of another monomer, DMA, from PDMDOMA-8.9 nm, increased the thickness to 52 nm. This observation verified the controlled nature of SI-ATRP of DMDOMA in DMF.

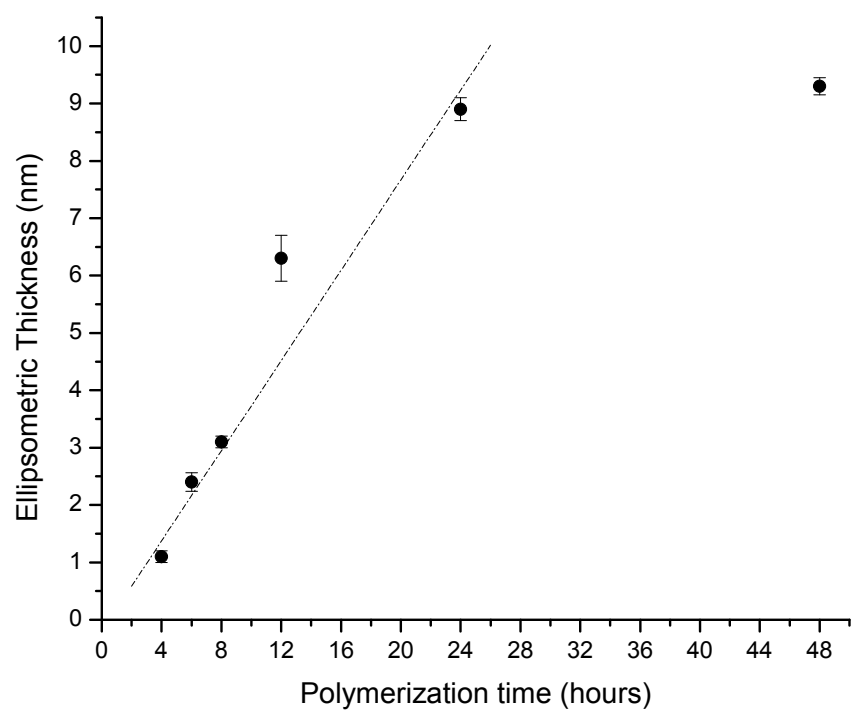

**Figure 2S** Dependence of the grafted PDMDOMA brushes on polymerization time. Polymerization conditions: Solvent: DMF; [DMDOMA]=2.5M; molar ratio of [CuCl]: [CuCl<sub>2</sub>]: [HMTETA] = 1: 0.1: 2

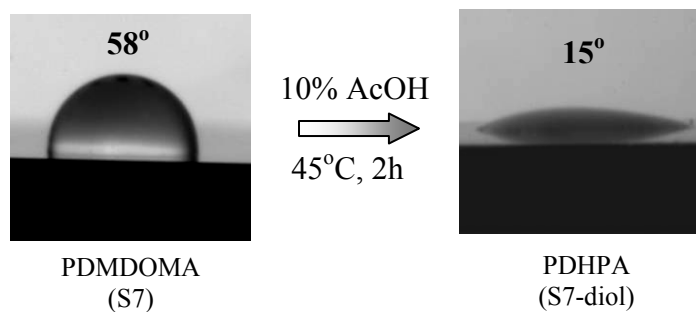

**Figure 3S** Images of water droplet on PDMDOMA (S7, left) and PDHPA brush (right). A moderately high contact angle was observed for the PDMDOMA brush at ambient temperature, in which PDMDOMA brush was in a collapsed state. After complete hydrolysis, the PDMDOMA brush was converted to the highly hydrophilic PDHPA brush, which shows much lower contact angle.

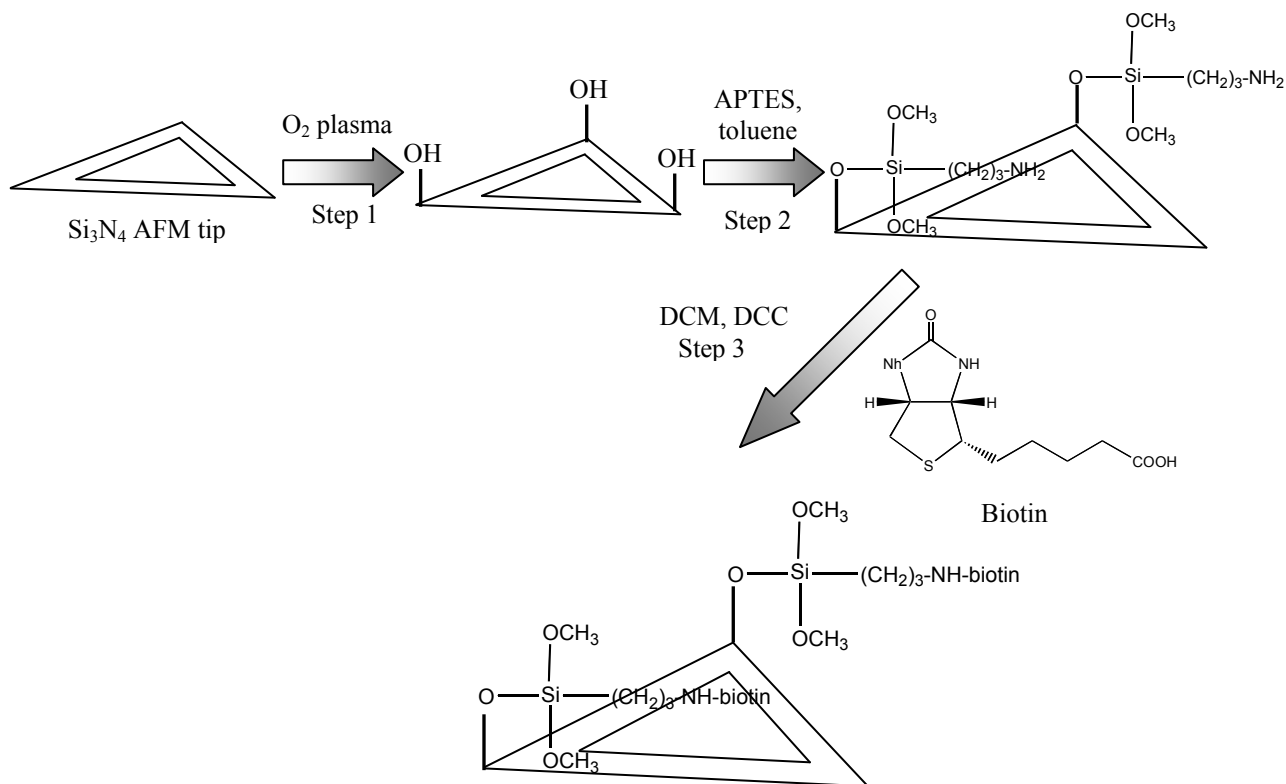

**Figure 4S** Modification of an AFM tip ( $\text{Si}_3\text{N}_4$ ) with biotin. Step 1: Generation of hydroxyl groups via gas plasma generator (M4L<sup>TM</sup>, PVA TePla America, Inc.). Treatment condition: time: 30 s, power: 25 W, chamber pressure (oxygen): 230 psi. Step 2: Amination. Reaction condition: APTES (aminopropyltriethoxysilane): 100  $\mu\text{l}$ , Toluene: 5 ml, temperature: 60  $^\circ\text{C}$ , time: 2 h. Step 3: Coupling of biotin. Reaction conditions: DCM: 5 ml; DIC: 0.1 g; biotin: 50 mg; time: 30 min.

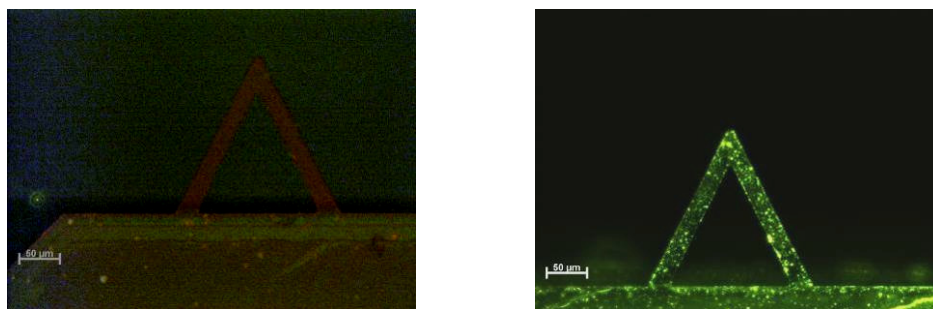

**Figure 5S** Fluorescence images of AFM tip a) before biotin coupling; b) after biotin coupling. Biotin(5-fluorescein) (Fluka, 53608) was used for this experiment. Coupling conditions: DCM: 2 ml; DIC: 0.5 g; biotin (5-fluorescein): 1 mg; time: 30 min. Clear contrast of fluorescence intensity before and after modification verified the successful modification of AFM tip by biotin.

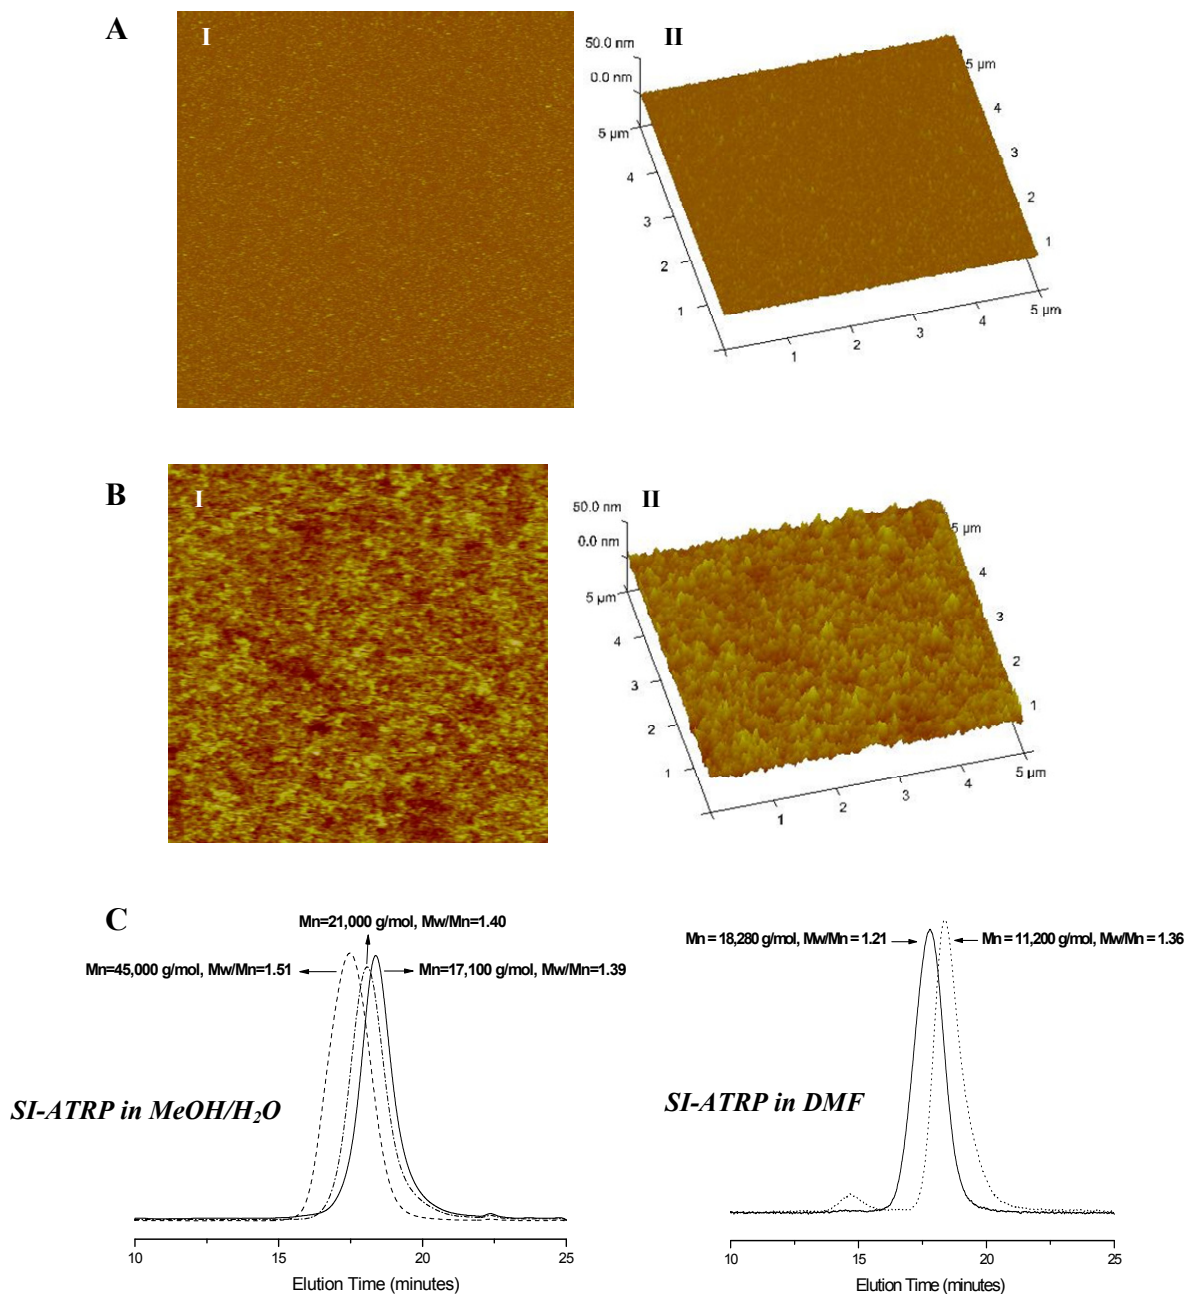

**Figures 6S** **A)** AFM topography (I) and 3-D image (II) of ATRP initiator modified surface (thickness of the initiator layer = 2.1 nm). The xy scale of I was 5  $\mu\text{m}$   $\times$  5  $\mu\text{m}$ ; Z scale was 50 nm; **B)** AFM topography (I) and 3-D image (II) of PDMDOMA brush grafted wafer surface (thickness of the grafted PDMDOMA brush = 23 nm). The xy scale of I was 5  $\mu\text{m}$   $\times$  5  $\mu\text{m}$ ; Z scale was 50 nm; **C)** Representative GPC-MALLS profiles

of PDHPA polymers, which were obtained by complete hydrolysis of “free” PDMDOMA polymers formed during SI-ATRP. Left: PDMDOMA obtained as “free” polymer from SI-ATRP in a H<sub>2</sub>O/MeOH (1:1) system (the detailed information for these samples was listed in Table 1S, supporting information); Right: PDMDOMA obtained as “free” polymer from SI-ATRP in a DMF system.

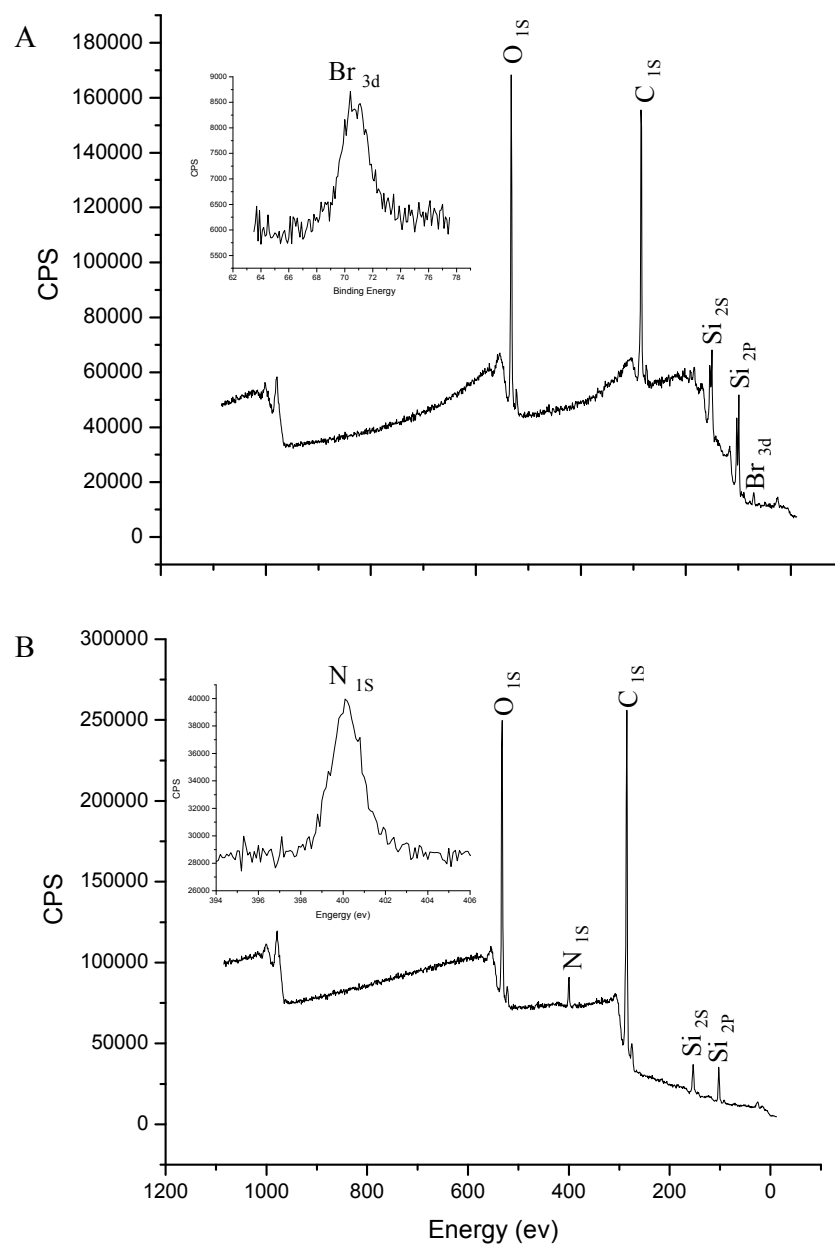

**Figure 7S** A) XPS spectrum of silicon wafer surface modified with bromine-containing ATRP initiator; B) XPS spectrum of PDMDOMA (S3) grafted silicon wafer surface.



**Table 1S** Characteristics of PDMDOMA brushes prepared in MeOH/H<sub>2</sub>O (1:1) solvent system <sup>a</sup>

| Samples | Reaction<br>time | Initiator | Ligand               | Solvent                     | Dry Thickness<br>(nm) | M <sub>n,SEC</sub> and Mw/Mn of “free”<br>polymer <sup>b</sup> | Graft density <sup>c</sup><br>(chains/nm <sup>2</sup> ) |
|---------|------------------|-----------|----------------------|-----------------------------|-----------------------|----------------------------------------------------------------|---------------------------------------------------------|
| S8      | 4                | Cl        | Me <sub>6</sub> TREN | MeOH/H <sub>2</sub> O (1:1) | 6.7 ± 0.3             | 17,100, 1.39                                                   | 0.28                                                    |
| S9      | 6                | Cl        | Me <sub>6</sub> TREN | MeOH/H <sub>2</sub> O (1:1) | 9.6 ± 0.5             | 21,000, 1.40                                                   | 0.33                                                    |
| S10     | 12               | Cl        | Me <sub>6</sub> TREN | MeOH/H <sub>2</sub> O (1:1) | 24.9 ± 0.8            | 45,000, 1.51                                                   | 0.40                                                    |

Note: a) Molar ratio of [CuCl]: [CuCl<sub>2</sub>]: [Ligand] = 1: 0.1: 2; monomer concentration [DMDOMA] = 2.5 M

b) “Free” solution polymer was obtained by addition of sacrificial initiator into the polymerization system. Methyl 2-chloropropionate was used as the free initiator.

c) Graft density of PDMDOMA brushes was calculated following the equation:  $\sigma = h\rho N_A/M_n$ , where  $\rho$  is the density of PDMDOMA (1.20g/cm<sup>3</sup>),  $N_A$  is Avogadro’s number, and  $M_n$  is the number average molecular weight.
